# Supplementary material for: Lacticaseibacillus rhamnosus GR-1 prevents autism-like behaviors by reshaping the maternal and offspring microbiome
Source: Research Square preprint supplement (doi:10.21203/rs.3.rs-5930312/v1), 2025-02-07
Supplement: Supplementary file 1 [file 69e05102cc93d9b0dae6401d.pdf]

**Fig. S1**

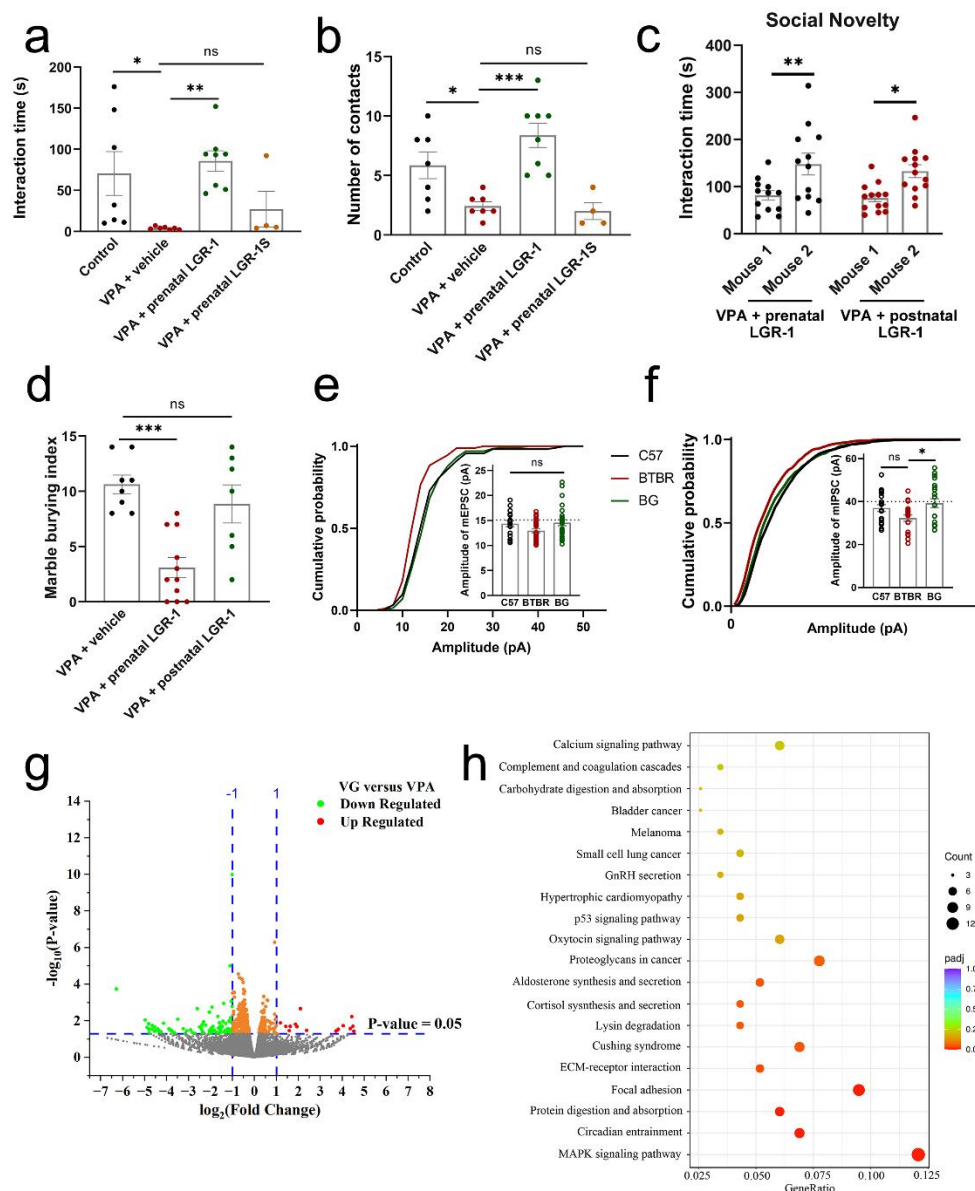

**Supplementary Fig. 1 LGR-1 prenatally attenuates the autism-like aberrations.**

(a and b) Reciprocal social interaction of the tested dyad, as presented by the duration (a) and number (b) of their interactions during 10-min test ( $n = 4-8$ ). c Social behavior as assessed in 3-chamber test ( $n = 12-13$ ). Postnatal treatment of LGR-1 lasted from weaning till PNW8. d Repetitive behavior as assessed in marble burying test ( $n = 7-11$ ). (e and f) Amplitude of mEPSC (e) and mIPSC (f) in neurons residing in medial prefrontal cortex ( $n = 17-28$ ). C57, C57BL/6J; BG, BTBR mice administered with LGR-1 during gestation. g Volcano plots depicting the

differentially-expressed genes in response to LGR-1 ( $n = 3$ ). VPA, VPA injection at E12.5; VG, VPA mice administered with LGR-1 during gestation. **h** KEGG pathways suppressed by LGR-1 treatment relative to VPA group. All data are given as mean  $\pm$  SEM. Statistical significance was determined by one-way ANOVA or paired t test (**c**). ns,  $P > 0.05$ ,  $^*P < 0.05$ ,  $^{**}P < 0.01$ , and  $^{***}P < 0.001$ .

**Fig. S2**

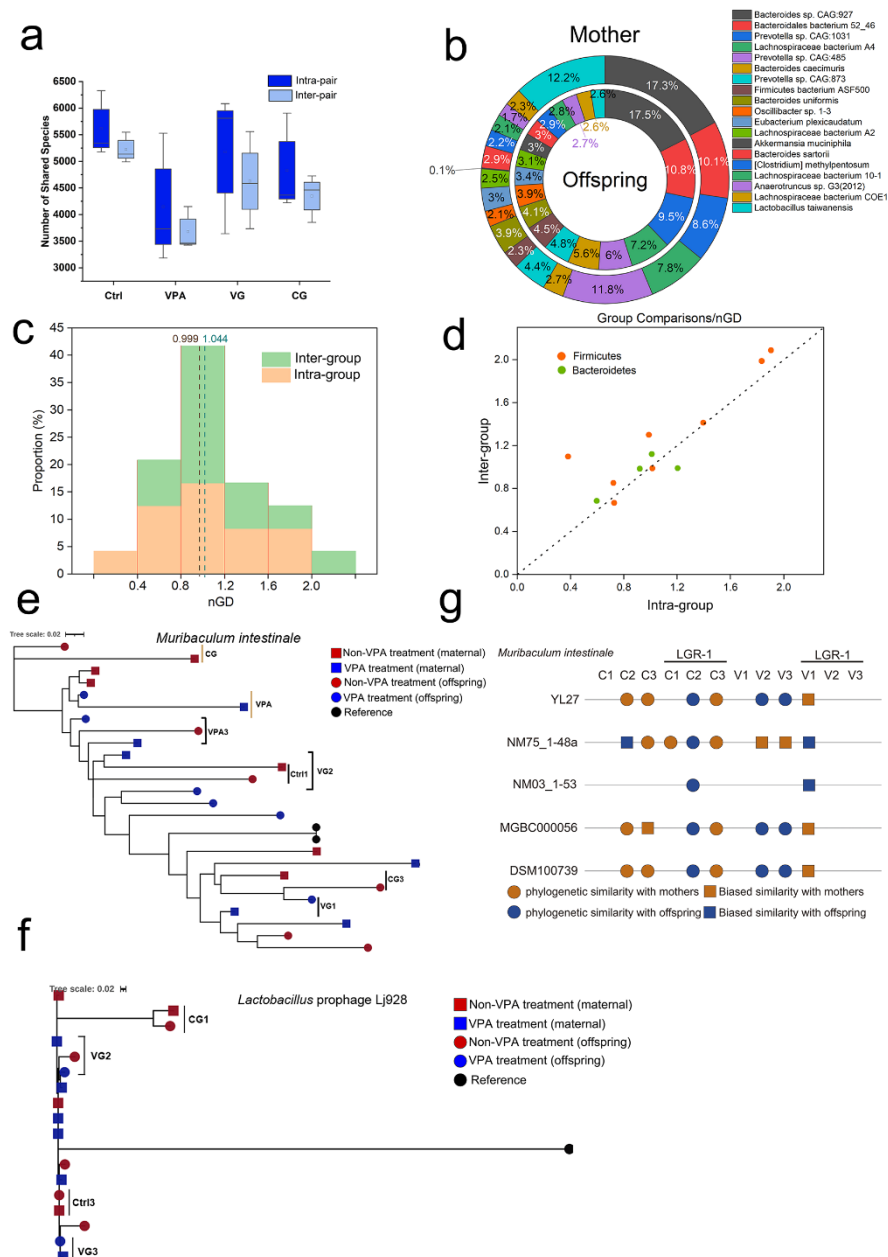

**Supplementary Fig. 2 Microbiota transmission occurs between dams and offspring.** **a** Number of shared species between dams and their offspring ( $n = 3$  mother-infant pair for each group). Ctrl, untreated mice; VPA, VPA injection at E12.5; VG, VPA mice orally gavaged with LGR-1 during gestation; CG, control mice orally gavaged with LGR-1. **b** The top 19 species and their proportions in dams and their offspring. **c** Histograms depicting the normalized genetic distances (nGDs) from the

microbes recovered. The average nGDs of intra-group and inter-group were indicated by the respective dashed lines. **d** Scatter plots showing the nGDs from the microbes recovered. Taxa are colored by phylum (Firmicutes, red; Bacteroidetes, green). **e** Maximum likelihood phylogenetic tree of *Muribaculum intestinale*. Nodes are colored by group (red, non-VPA treatment; blue, VPA treatment), and shaped by generation (rectangle, dam; circle, offspring). Mother-infant pairs with adjacent microbial similarity were indicated by black vertical line, and non-mother-infant pairs within the same treatment group were indicated by yellow vertical line. **f** Maximum likelihood phylogenetic tree of *Lactobacillus* prophage Lj928. **g** Map of the distribution of *Muribaculum intestinale* strains in the respective groups. Circle refers to the presence in both dams and offspring but with a preferred enrichment (yellow, mother; blue, offspring), and rectangle refers to the sole presence in either mother (yellow) or offspring (blue). The cutoff value is set as 0.15 of all genetic distances calculated.

**Fig. S3**

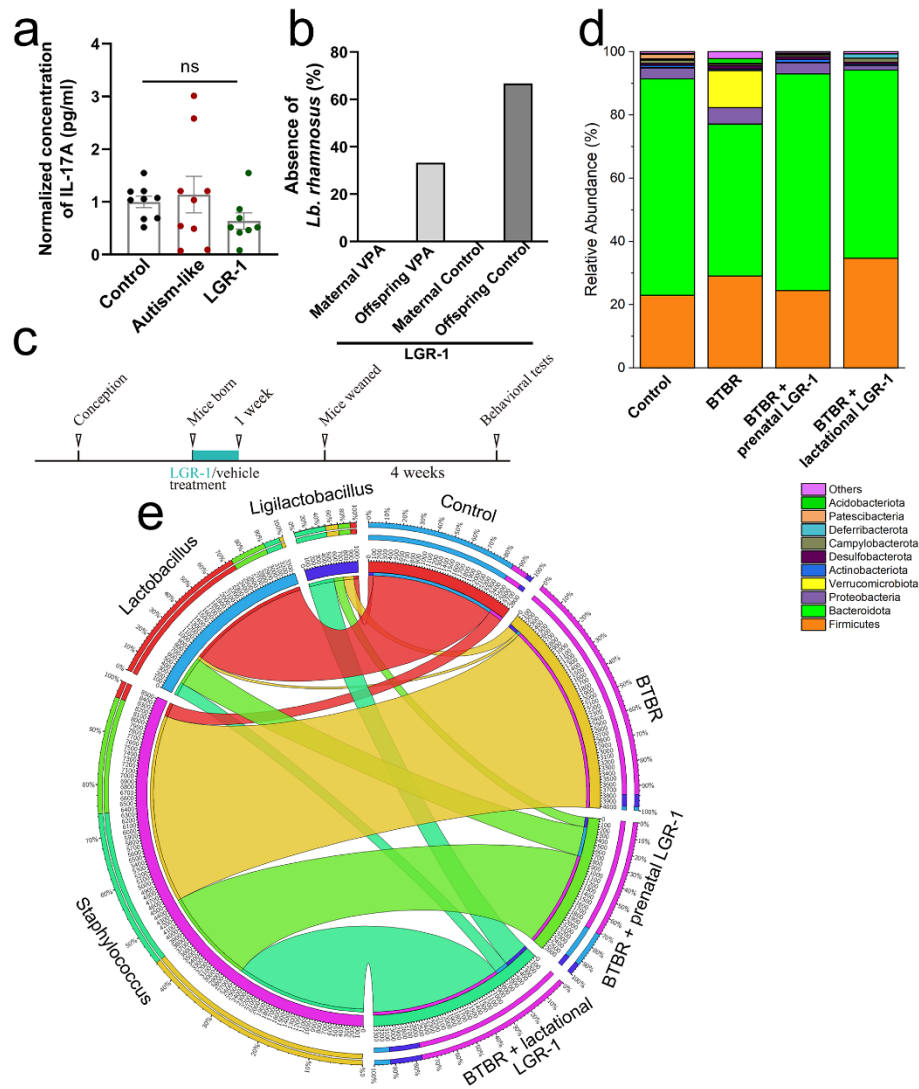

**Supplementary Fig. 3 LGR-1 does not act by altering maternal IL-17A or transmit to offspring *per se*.** **a** Maternal IL-17A levels in response to LGR-1 treatment ( $n = 8-9$ ). **b** Percentage of absence of *Lacticaseibacillus rhamnosus* residing in both mothers and offspring ( $n = 3$  mother-infant pair for each group). **c** Schematic of LGR-1 treatment during the first week of lactation ( $n = 5-8$ ). **d** Relative abundance of microbial taxa on phylum level. The top ten most-enriched taxa were presented. **e** Circos plot describing the composition of the top 5 most-enriched genera in various treatment groups. All data are given as mean  $\pm$  SEM or single percentage data for (**b**). Statistical significance was determined by one-way ANOVA. ns,  $P > 0.05$ .

**Fig. S4**

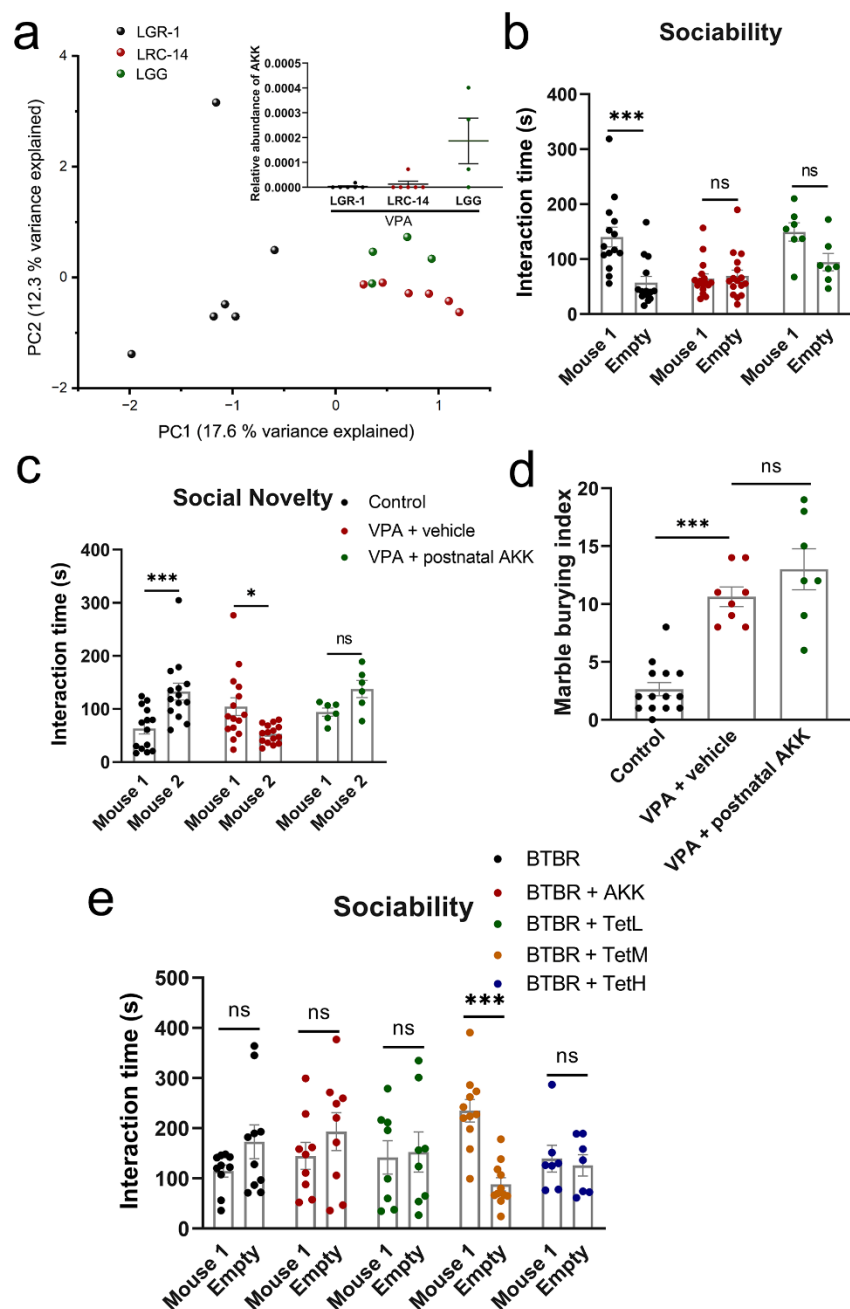

**Supplementary Fig. 4 AKK is involved in the modulation of autism-like behaviors.** **a** PCA analysis for intestinal microbiome of offspring exposed by different strains prenatally ( $n = 4-6$ ). The impact on the AKK level was indicated in the insert. **(b and c)** Sociability **(b)** and social novelty **(c)** of mice postnatally fed with AKK as assessed in 3-chamber test ( $n = 6-16$ ). AKK, *Akkermansia muciniphila*. **d** Repetitive behavior as assessed by marble burying test ( $n = 7-14$ ). **e** Sociability of mice subjected to tetracycline treatment under varying doses. Tet, tetracycline; L, low

concentration (1.5 g/l); M, medium concentration (3 g/l); H, high concentration (10 g/l). All data are given as mean  $\pm$  SEM. Statistical significance was determined by one-way ANOVA (**d**) or two-way ANOVA with post hoc multiple comparisons. ns,  $P > 0.05$ , \* $P < 0.05$  and \*\*\* $P < 0.001$ .

**Fig. S5**

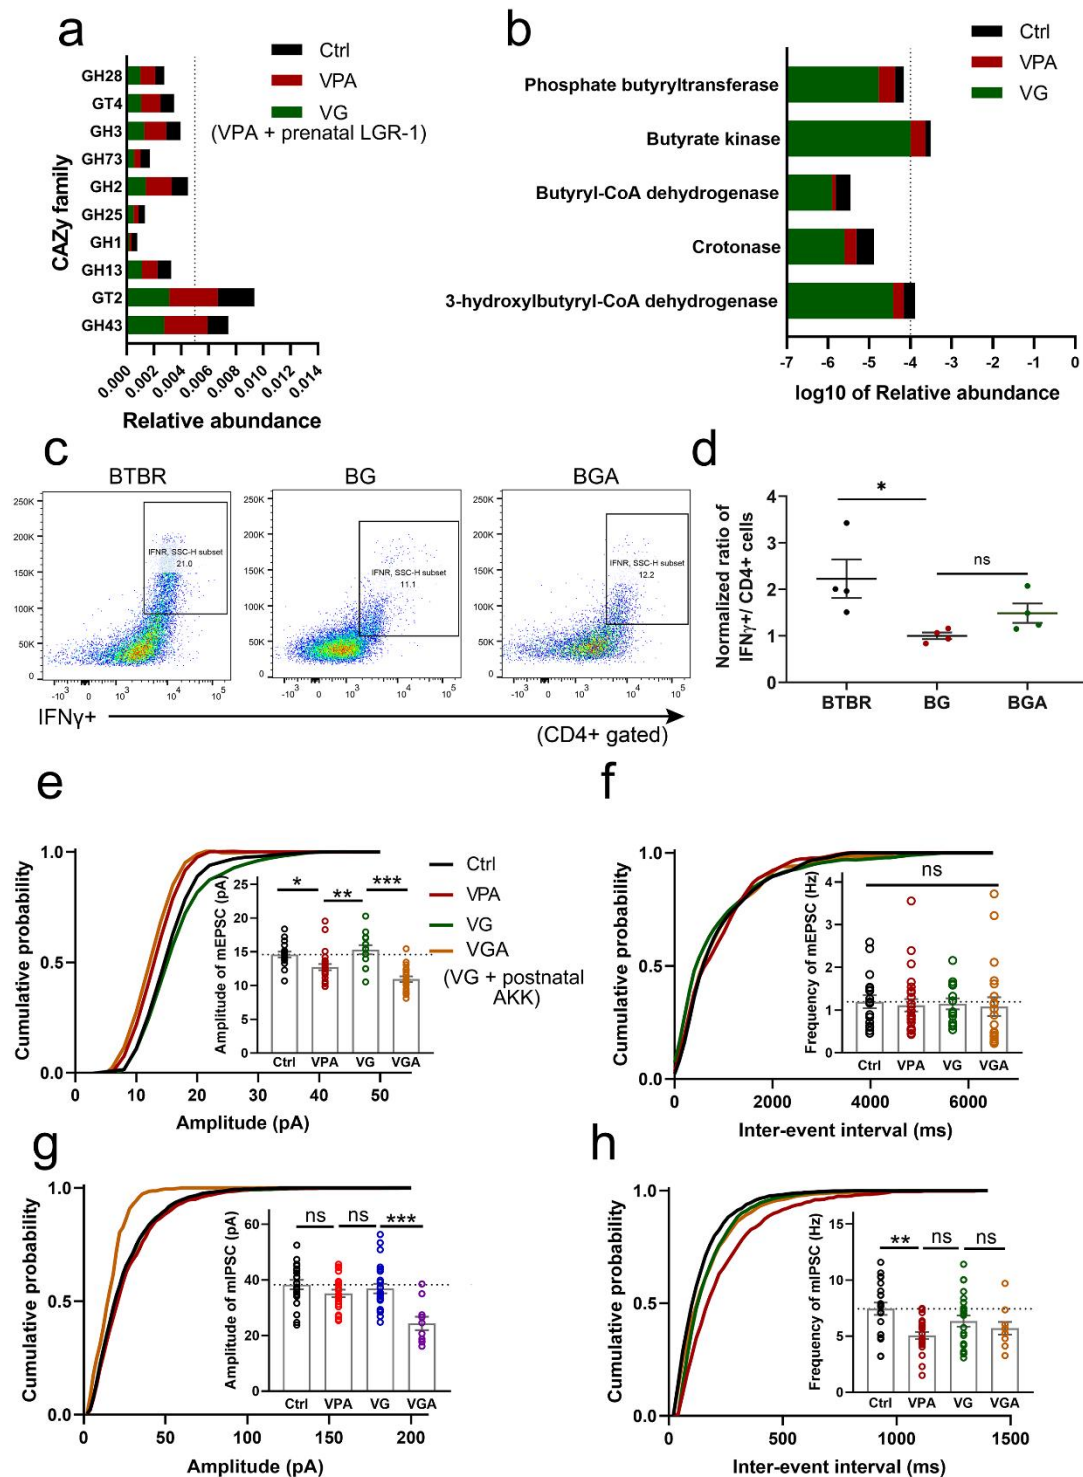

**Supplementary Fig. 5 Gut-brain axis is implicated in the microbe-based intervention.** **a** Stacked chart depicting the distribution of top 10 CAZy (carbohydrate-active enzyme) families. Ctrl, untreated group; V/VPA, VPA treated group; G, LGR-1 treated group prenatally. **b** Stacked chart depicting the distribution



of enzymes related to butyrate synthesis. (**c** and **d**) Flow cytometric analysis of systemic immunity in spleens of 8-week-old male mice ( $n = 4$  mice per group). Representative pseudocolor (**c**) plots of splenic IFN $\gamma$ -expressing cells were shown. The frequencies (**d**) of IFN $\gamma^+$ -expressing cells in the CD4 $^+$  population were then normalized against the BTBR mice pretreated with LGR-1 (BG group) and shown in statistical plots. (**e** and **f**) Amplitude (**e**) and frequency (**f**) of mEPSC in neurons residing in medial prefrontal cortex ( $n = 14-25$ ). A, the postnatal AKK-treated pups prenatally exposed by LGR-1. (**g** and **h**) Amplitude (**g**) and frequency (**h**) of mIPSC in neurons residing in medial prefrontal cortex ( $n = 10-24$ ). All data are calculated as mean  $\pm$  SEM and derived. Statistical significance was determined by one-way ANOVA. ns,  $P > 0.05$ , \* $P < 0.05$ , \*\* $P < 0.01$ , and \*\*\* $P < 0.001$ .

**Supplementary Video 1** Representative video clips recording the movement of a VPA-exposed mouse in the second session (sociability) of three-chamber test.

**Supplementary Video 2** Representative video clips recording the movement of a VPA-exposed mouse in the third session (social novelty) of three-chamber test.

**Supplementary Video 3** Representative video clips recording the movement of an LGR-1-pretreated deficient mouse in the second session of three-chamber test.

**Supplementary Video 4** Representative video clips recording the movement of an LGR-1-pretreated deficient mouse in the third session of three-chamber test.
